# Supplementary material for: Soil Nitrogen Treatment Alters Microbiome Networks Across Farm Niches
Source: Front Microbiol. 2022 Feb 14;12:786156. doi: 10.3389/fmicb.2021.786156 (PMC8882991; doi:10.3389/fmicb.2021.786156)
Supplement: Supplementary Table 1 — Sample metadata table. [file Table_1.XLSX]

## Sheet: Table 1
SampleType	ANOSIM_Significance	ANOSIM_Stat_R	ADONIS_Significances	R_Square	Amplicon Type
Faecal	0.81	-0.0228116	0.384	0.0172115	16S
Rumen	0.79	-0.0267907	0.694	0.0148938	16S
P.RyeGrassLeaf	0.74	-0.130769	0.6	0.0903439	16S
WhiteCloverLeaf	0.089	0.122685	0.397	0.0832306	16S
BulkSoil	0.948	-0.16	0.399	0.0974382	16S
P.RyeGrassRoot	0.845	-0.0810185	0.509	0.0862794	16S
WhiteCloverRoot	0.004	0.316667	0.01	0.201133	16S
Faecal	0.743	-0.0180385	0.23	0.0378323	ITS
Rumen	0.367	0.0067504	0.268	0.046888	ITS
P.RyeGrassLeaf	0.796	-0.169231	0.883	0.16768	ITS
WhiteCloverLeaf	0.82	-0.122685	0.717	0.146759	ITS
BulkSoil	0.973	-0.173333	0.803	0.1516	ITS
P.RyeGrassRoot	0.926	-0.165509	0.939	0.132384	ITS
WhiteCloverRoot	0.493	-0.0166667	0.457	0.193482	ITS
Faecal	0.321	0.0334817	0.322	0.00804833	18S
Rumen	0.027	0.0429846	0.048	0.0561117	18S
P.RyeGrassLeaf	0.923	0.0860459	0.545	-0.0384615	18S
WhiteCloverLeaf	0.826	0.179844	0.704	-0.0833333	18S
BulkSoil	0.75	0.154318	0.917	-0.131667	18S
P.RyeGrassRoot	0.153	0.279379	0.057	0.19	18S
WhiteCloverRoot	0.056	0.318707	0.047	0.216667	18S
